# Supplementary material for: 1,1′-Disubstituted ferrocene containing hexacatenar thermotropic liquid crystals
Source: Royal Society of Chemistry journal article supplement (doi:10.1039/b008904o), 2001-01-01
Supplement: b008904o.doc [file b008904o.doc]

#### SUPPLEMENTARY INFORMATION

1. 1H NMR data of compounds **2b-h** and **3b-h**.

2. DSC diagram exhibited during the first heating scan by ferrocene containing hexacartenar metallmesogens.

3. X-ray pattern of **4a** in a crystalline phase.

1. 1H NMR data of the compounds **2b-h** and **3b-h**.

**4’-Hydroxybiphenyl-3,4,5-trioctyloxyphenylbenzoate (2b).** Yield: 40%; 1H-NMR (CDCl3, TMS, , ppm); 0.86-0.89 (m, 9H, C*H*3), 1.27-1.50 (m, 30H, CH3(C*H*2)5), 1.76-1.88 (m, 6H, OCH2C*H*2), 4.01-4.07 (m, 6H, OC*H*2), 4.89 (s, 1H, O*H*), 6.92 (d, 2Ar-H, *m* to OH, *J* = 8.6 Hz), 7.23 (d, 2Ar-H, *m* to O2C, *J* = 8.6 Hz), 7.41 (s, 2Ar-H, *o* to CO2), 7.49 (d, 2Ar-H, *o* to OH, *J* = 8.6 Hz), 7.59 (d, 2Ar-H, *o* to O2C, *J* = 8.6 Hz).

**4’-Hydroxybiphenyl-3,4,5-tridecyloxyphenylbenzoate (2c).** Yield: 37%; 1H-NMR (CDCl3, TMS, , ppm) ; 0.86-0.89 (m, 9H, C*H*3), 1.25-1.50 (m, 42H, CH3(C*H*2)7), 1.76-1.86 (m, 6H, OCH2C*H*2), 4.01-4.06 (m, 6H, OC*H*2), 4.86 (s, 1H, O*H*), 6.92 (d, 2Ar-H, *m* to OH, *J* = 8.6 Hz), 7.23 (d, 2Ar-H, *m* to O2C, *J* = 8.6 Hz), 7.41 (s, 2Ar-H, *o* to CO2), 7.46 (d, 2Ar-H, *o* to OH, *J* = 8.6 Hz), 7.59 (d, 2Ar-H, *o* to O2C, *J* = 8.6 Hz).

**4’-Hydroxybiphenyl-3,4,5-tridodecyloxyphenylbenzoate (2d).** Yield: 45%; 1H-NMR (CDCl3, TMS, , ppm); 0.84-0.89 (m, 9H, C*H*3), 1.29-1.51 (m, 54H, CH3(C*H*2)9), 1.75-1.86 (m, 6H, OCH2C*H*2), 4.01-4.06 (m, 6H, OC*H*2), 4.82 (s, 1H, O*H*), 6.91 (d, 2Ar-H, *m* to OH, *J* = 8.6 Hz), 7.22 (d, 2Ar-H, *m* to O2C, *J* = 8.6 Hz), 7.41 (s, 2Ar-H, *o* to CO2), 7.46 (d, 2Ar-H, *o* to OH, *J* = 8.6 Hz), 7.58 (d, 2Ar-H, *o* to O2C, *J* = 8.6 Hz).

**4’-Hydroxybiphenyl-3,4,5-tritetradecyloxyphenylbenzoate (2e).** Yield: 37%; 1H-NMR (CDCl3, TMS, , ppm); 0.83-0.89 (m, 9H, C*H*3), 1.32-1.50 (m, 66H, CH3(C*H*2)11), 1.77-1.86 (m, 6H, OCH2C*H*2), 4.03-4.08 (m, 6H, OC*H*2), 4.89 (s, 1H, O*H*), 6.92 (d, 2Ar-H, *m* to OH, *J* = 8.6 Hz), 7.26 (d, 2Ar-H, *m* to O2C, *J* = 8.6 Hz), 7.41 (s, 2Ar-H, *o* to CO2), 7.49 (d, 2Ar-H, *o* to OH, *J* = 8.6 Hz), 7.59 (d, 2Ar-H, *o* to O2C, *J* = 8.6 Hz).

**4’-Hydroxybiphenyl-3,4,5-trihexadecyloxyphenylbenzoate (2f).** Yield: 48%; 1H-NMR (CDCl3, TMS, , ppm); 0.85-0.90 (m, 9H, C*H*3), 1.32-1.50 (m, 78H, CH3(C*H*2)13), 1.77-1.88 (m, 6H, OCH2C*H*2), 4.03-4.09 (m, 6H, OC*H*2), 4.92 (s, 1H, O*H*), 6.92 (d, 2Ar-H, *m* to OH, *J* = 8.6 Hz), 7.25 (d, 2Ar-H, *m* to O2C, *J* = 8.6 Hz), 7.41 (s, 2Ar-H, *o* to CO2), 7.49 (d, 2Ar-H, *o* to OH, *J* = 8.6 Hz), 7.59 (d, 2Ar-H, *o* to O2C, *J* = 8.6 Hz).

**4’-Hydroxybiphenyl-3,4,5-trioctadecyloxyphenylbenzoate (2g).** Yield: 46%; 1H-NMR (CDCl3, TMS, , ppm); 0.85-0.90 (m, 9H, C*H*3), 1.30-1.50 (m, 90H, CH3(C*H*2)15), 1.78-1.89 (m, 6H, OCH2C*H*2), 4.04-4.10 (m, 6H, OC*H*2), 5.06 (s, 1H, O*H*), 6.92 (d, 2Ar-H, *m* to OH, *J* = 8.6 Hz), 7.25 (d, 2Ar-H, *m* to O2C, *J* = 8.6 Hz), 7.41 (s, 2Ar-H, *o* to CO2), 7.49 (d, 2Ar-H, *o* to OH, *J* = 8.6 Hz), 7.59 (d, 2Ar-H, *o* to O2C, *J* = 8.6 Hz).

**4’-Hydroxybiphenyl-3,4,5-trieicosyloxyphenylbenzoate (2h).** Yield: 33%; 1H-NMR (CDCl3, TMS, , ppm); 0.85-0.90 (m, 9H, C*H*3), 1.17-1.45 (m, 102H, CH3(C*H*2)17), 1.74-1.86 (m, 6H, OCH2C*H*2), 4.02-4.07 (m, 6H, OC*H*2), 4.84 (s, 1H, O*H*), 6.92 (d, 2Ar-H, *m* to OH, *J* = 8.6 Hz), 7.22 (d, 2Ar-H, *m* to O2C, *J* = 8.6 Hz), 7.34 (s, 2Ar-H, *o* to CO2), 7.49 (d, 2Ar-H, *o* to OH, *J* = 8.6 Hz), 7.59 (d, 2Ar-H, *o* to O2C, *J* = 8.6 Hz).

**4’-(4”-Hydroxyphenylcarbonyloxy)biphenyl-3,4,5-trioctyloxybenzoate (3b).** Yield: 73%; 1H-NMR (CDCl3, TMS, , ppm); 0.86-0.89 (m, 9H, C*H*3), 1.29-1.49 (m, 30H, CH3(C*H*2)5), 1.72-1.89 (m, 6H, OCH2C*H*2), 4.04-4.10 (m, 6H, OC*H*2), 6.89 (d, 2Ar-H, o to OH, *J* = 8.7 Hz), 7.29 (m, 4Ar-H, 2*m* to O2C), 7.44 (s, 2Ar-H, trioctyloxyphenyl), 7.60-7.64 (m, 4Ar-H, 2*o* (biphenyl) to CO2), 8.09 (d, 2Ar-H, *m* to OH, *J* = 8.7 Hz).

**4’-(4”-Hydroxyphenylcarbonyloxy)biphenyl-3,4,5-tridecyloxybenzoate (3c).** Yield: 63%; 1H-NMR (CDCl3, TMS, , ppm); 0.85-0.88 (m, 9H, C*H*3), 1.27-1.49 (m, 42H, CH3(C*H*2)7), 1.71-1.89 (m, 6H, OCH2C*H*2), 4.03-4.08 (m, 6H, OC*H*2), 5.47 (s, 1H, O*H*), 6.93 (d, 2Ar-H, *o* to OH, *J* = 8.7 Hz), 7.29 (m, 4Ar-H, 2*m* to O2C), 7.43 (s, 2Ar-H, tridecyloxyphenyl), 7.61-7.65 (m, 4Ar-H, 2*o* (biphenyl) to CO2), 8.14 (d, 2Ar-H, *m* to OH, *J* = 8.7 Hz).

**4’-(4”-Hydroxyphenylcarbonyloxy)biphenyl-3,4,5-tridodecyloxybenzoate (3d).** Yield: 65%; 1H-NMR (CDCl3, TMS, , ppm); 0.85-0.90 (m, 9H, C*H*3), 1.26-1.49 (m, 54H, CH3(C*H*2)9), 1.74-1.86 (m, 6H, OCH2C*H*2), 4.03-4.08 (m, 6H, OC*H*2), 5.50 (s, 1H, O*H*), 6.93 (d, 2Ar-H, *o* to OH, *J* = 8.7 Hz), 7.29 (m, 4Ar-H, 2*m* to O2C), 7.43 (s, 2Ar-H, tridodecyloxyphenyl), 7.61-7.67 (m, 4Ar-H, 2*o* (biphenyl) to CO2), 8.14 (d, 2Ar-H, *m* to OH, *J* = 8.7 Hz).

**4’-(4”-Hydroxyphenylcarbonyloxy)biphenyl-3,4,5-tritetradecyloxybenzoate (3e).** Yield: 57%; 1H-NMR (CDCl3, TMS, , ppm); 0.85-0.90 (m, 9H, C*H*3), 1.25-1.50 (m, 66H, CH3(C*H*2)11), 1.74-1.86 (m, 6H, OCH2C*H*2), 4.03-4.09 (m, 6H, OC*H*2), 5.53 (s, 1H, O*H*), 6.91 (d, 2Ar-H, *o* to OH, *J* = 8.7 Hz), 7.29 (m, 4Ar-H, 2*m* to O2C), 7.43 (s, 2Ar-H, tritetradecyloxyphenyl), 7.61-7.68 (m, 4Ar-H, 2*o* (biphenyl) to CO2), 8.13 (d, 2Ar-H, *m* to OH, *J* = 8.7 Hz).

**4’-(4”-Hydroxyphenylcarbonyloxy)biphenyl-3,4,5-trihexadecyloxybenzoate (3f).** Yield: 57%; 1H-NMR (CDCl3, TMS, , ppm); 0.85-0.87 (m, 9H, C*H*3), 1.26-1.54 (m, 78H, CH3(C*H*2)13), 1.74-1.87 (m, 6H, OCH2C*H*2), 4.04-4.08 (m, 6H, OC*H*2), 5.91 (s, 1H, O*H*), 6.87 (d, 2Ar-H, *o* to OH, *J* = 8.7 Hz), 7.29 (m, 4Ar-H, 2*m* to O2C), 7.44 (s, 2Ar-H, trihexadecyloxyphenyl), 7.61-7.66 (m, 4Ar-H, 2*o* (biphenyl) to CO2), 8.10 (d, 2Ar-H, *m* to OH, *J* = 8.7 Hz).

**4’-(4”-Hydroxyphenylcarbonyloxy)biphenyl-3,4,5-trioctadecyloxybenzoate (3g).** Yield: 43%; 1H-NMR (CDCl3, TMS, , ppm); 0.85-0.88 (m, 9H, C*H*3), 1.18-1.50 (m, 90H, CH3(C*H*2)15), 1.81-1.87 (m, 6H, OCH2C*H*2), 4.04-4.09 (m, 6H, OC*H*2), 5.48 (s, 1H, O*H*), 6.91 (d, 2Ar-H, *o* to OH, *J* = 8.7 Hz), 7.29 (m, 4Ar-H, 2*m* to O2C), 7.43 (s, 2Ar-H, trioctadecyloxyphenyl), 7.61-7.65 (m, 4Ar-H, 2*o* (biphenyl) to CO2), 8.14 (d, 2Ar-H, *m* to OH, *J* = 8.7 Hz).

**4’-(4”-Hydroxyphenylcarbonyloxy)biphenyl-3,4,5-trieicosyloxybenzoate (3h)**. Yield: 40%; 1H-NMR (CDCl3, TMS, , ppm); 0.85-0.90 (m, 9H, C*H*3), 1.18-1.50 (m, 102H, CH3(C*H*2)17), 1.74-1.86 (m, 6H, OCH2C*H*2), 4.03-4.08 (m, 6H, OC*H*2), 5.43 (s, 1H, O*H*), 6.93 (d, 2Ar-H, *o* to OH, *J* = 8.7 Hz), 7.34 (m, 4Ar-H, 2*m* to O2C), 7.43 (s, 2Ar-H, trieicosyloxyphenyl), 7.61-7.68 (m, 4Ar-H, 2*o* (biphenyl) to CO2), 8.15 (d, 2Ar-H, *m* to OH, *J* = 8.7 Hz).

2. DSC diagram exhibited during the 1st heating scan by ferrocene containing hexacartenar metallmesogens.

3. X-ray patterns of the **4a** at a crystalline phase.
